# Supplementary material for: Highly efficient reversible adsorption of NO2 in imidazole sulfonate room temperature ionic liquids
Source: Royal Society of Chemistry journal article supplement (doi:10.1039/c4ra05268d), 2014-01-01
Supplement: c4ra05268d1.pdf [file c4ra05268d1.pdf]

Electronic Supplementary Information (ESI) for Chemical Communications

This journal is (c) The Royal Society of Chemistry 2014

## **Highly Efficient Reversible Adsorption of NO<sub>2</sub> in Imidazole Sulfonate Room Temperature Ionic Liquids**

Gang Yuan, Feng Zhang, Jiao Geng\* and You-Ting Wu\*

Department of Chemical Engineering, School of Chemistry and Chemical

Engineering, Nanjing University, Nanjing 210093, P.R. China

E-mail: gengjiao@nju.edu.cn; ytwu@nju.edu.cn

### **Materials and General Methods**

The imidazole sulfonate room temperature ionic liquids including 1-ethyl-3-methylimidazolium trifluoromethanesulfonate ([EMIM]OTf), 1-butyl-3-methylimidazolium trifluoromethanesulfonate ([BMIM]OTf), and 1-hexyl-3-methylimidazolium trifluoromethanesulfonate ([HMIM]O-Tf) were purchased from Shanghai Cheng Jie Chemical Co. Ltd. (China), with the purity of above 99% and dried under vacuum at 70 °C for 24 h to remove possible traces of water prior to use; The NO<sub>2</sub> with the purity of above 99.5% was purchased from Nanjing Tong Guang Special Gas Co. Ltd. (China). The UV-vis spectra were recorded on a UV-3600 UV-Vis-NIR Spectrometer (Shimadzu, Japan). The FTIR spectra were recorded on a Nicolet iS10 instrument (Nicolet, USA). The photographs were taken with a DSC-TX100 camera (Sony, Japan). The absorption facilities were purchased from Jiangsu

Haian Petroleum Scientific Instrument Co. Ltd. (China). The pressure data were recorded with a WIDEPLUS-8 pressure sensor purchased from Fujian Shangrun Precision Instrument Co. Ltd. (China). The temperature was controlled by a CKW-1 heating instrument purchased from Nanjing Chaoyang Instruments Co. Ltd. (China).

## **Adsorption and Desorption of NO<sub>2</sub>**

By absorbing NO<sub>2</sub>, two kettles were connected together with a valve and immersed in a water bath of desirable temperature. A vacuum pump was connected to the kettles to control the pressure of the system, and a pressure sensor with the accuracy of 0.001 MPa was used to show and record the pressure data during the adsorption-desorption processes. NO<sub>2</sub> was released to the surface of ILs contained in a glass container with an inner diameter of 2.5 cm, and the initial pressure was recorded by the pressure sensor. With the help of magnetic stirring, the NO<sub>2</sub> was automatically absorbed by the ILs and the pressure changes were recorded. After the absorbing equilibrium was achieved, the connected kettles were evacuated so that the NO<sub>2</sub> could be released rapidly. Then the next round of absorption-desorption was conducted by using the same method.

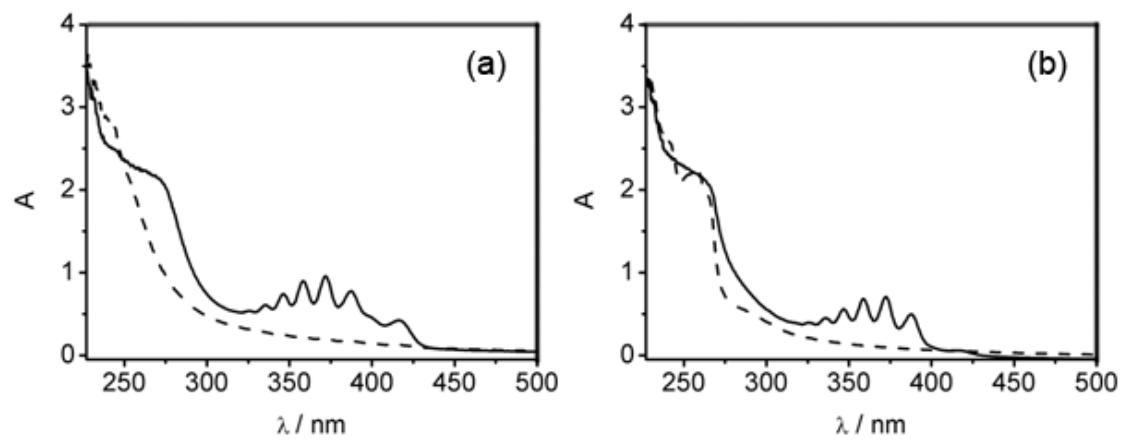

**Fig. S1** UV-vis spectra of [Emim]OTf (a) and [Bmim]OTf (b), before (dashed lines) and after (solid lines) absorption of NO<sub>2</sub>.

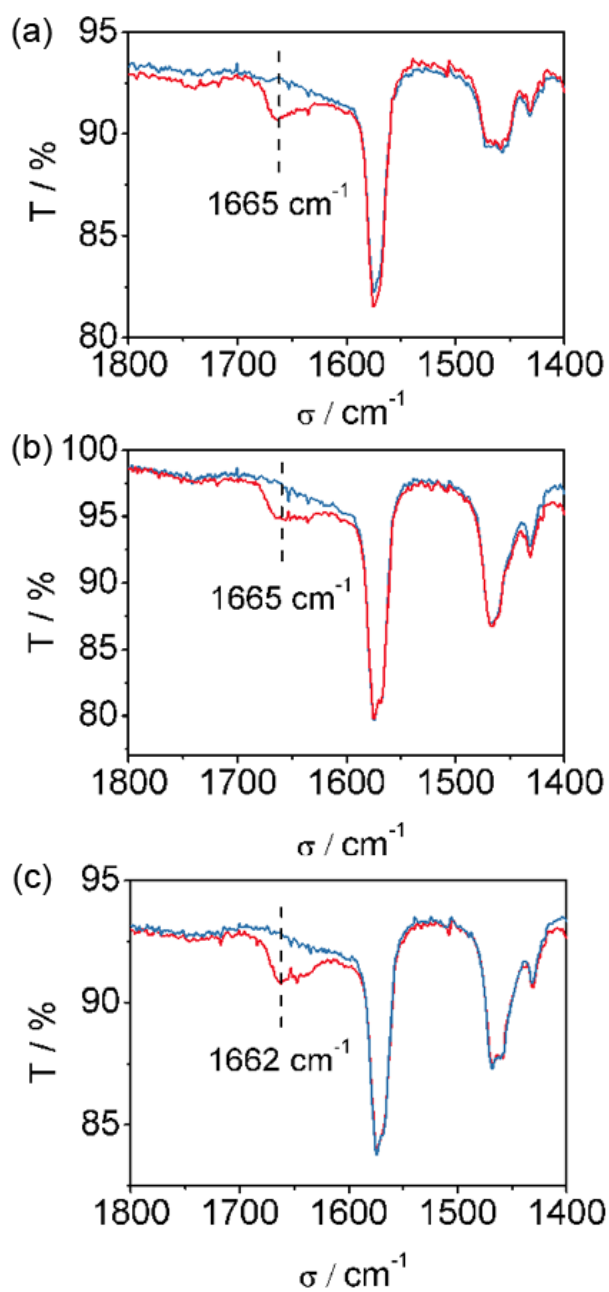

**Fig. S2** FTIR spectra of [Emim]OTf (a), [Bmim]OTf (b), and [Hmim]OTf, before (blue lines) and after (red lines) absorption of  $\text{NO}_2$

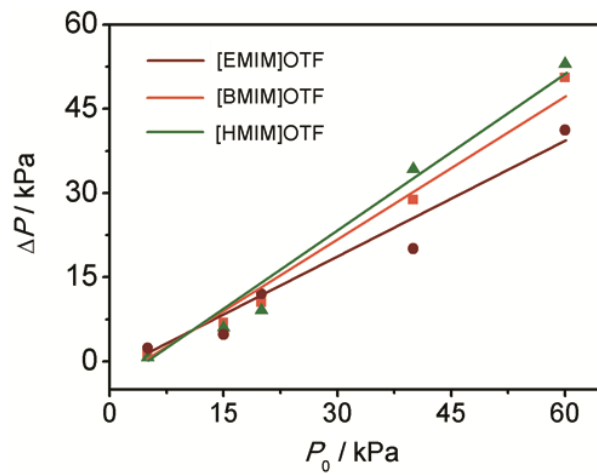

**Fig. S3** The relationship between the pressure changes during the absorption of  $\text{NO}_2$  in different ILs (left corner) and the initial pressures of  $\text{NO}_2(P_0)$

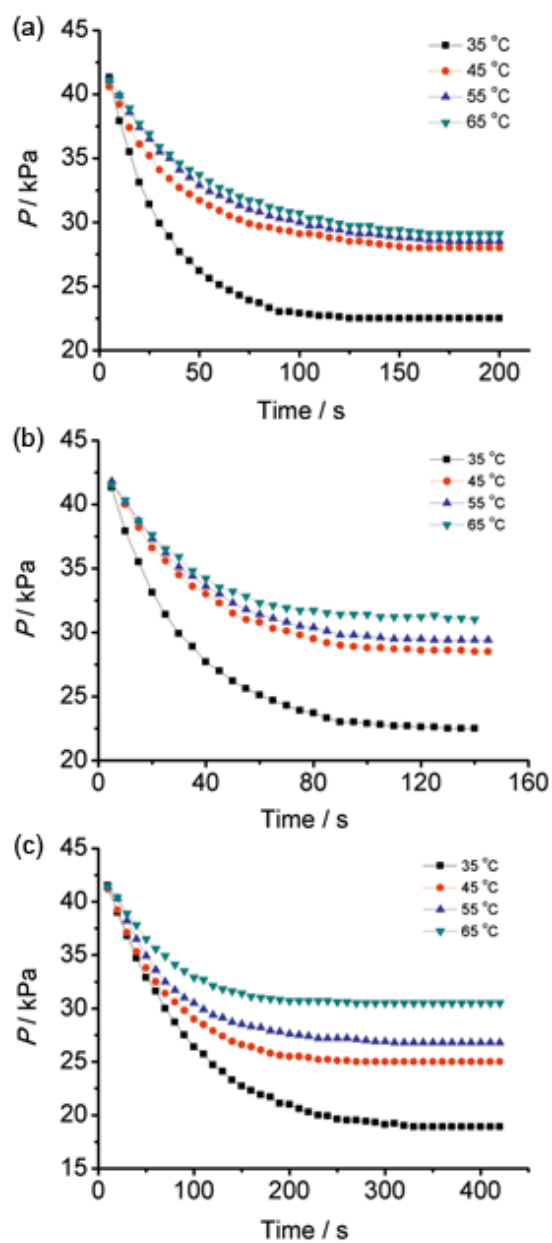

**Fig. S4** The real-time system pressures ( $P$ ) during the absorption of  $\text{NO}_2$  in [Emim]OTf (a), [Bmim]OTf (b), and [Hmim]OTf, at the different temperatures (right corners).
